# Supplementary material
Source: publisher figshare collection journal article supplement (https://osapublishing.figshare.com/ndownloader/files/31075714)
Supplement: Supplementary file 1 [file 31075714]

# Holographic pancake optics for thin and lightweight optical see-through augmented reality: supplement

**OZAN CAKMAKCI,<sup>1,\*</sup> YI QIN,<sup>1</sup> PETER BOSEL,<sup>1</sup> AND GORDON WETZSTEIN<sup>2</sup>** 

<sup>1</sup>*Google, 1600 Amphitheater Parkway, Mountain View, CA 94043, USA*

<sup>2</sup>*Electrical Engineering Department, Stanford University, Stanford, California 94305, USA*

\*[ozan cakmakci@google.com](mailto:ozan cakmakci@google.com)

---

This supplement published with Optica Publishing Group on 13 October 2021 by The Authors under the terms of the [Creative Commons Attribution 4.0 License](https://creativecommons.org/licenses/by/4.0/) in the format provided by the authors and unedited. Further distribution of this work must maintain attribution to the author(s) and the published article's title, journal citation, and DOI.

Supplement DOI: <https://doi.org/10.6084/m9.figshare.16750537>

Parent Article DOI: <https://doi.org/10.1364/OE.439585>

# Holographic Pancake Optics for Thin and Lightweight Optical See-through Augmented Reality: supplemental document

The see-through transmission was measured with an unpolarized source using an NDK haze meter to be 27.9% in the combiner region and 88.4 % outside of the combiner region of the optic. The optical see-through transmission measurement of the holographic pancake optics across the visible spectrum is shown for both the combiner region and the lightguide in Fig. S1.

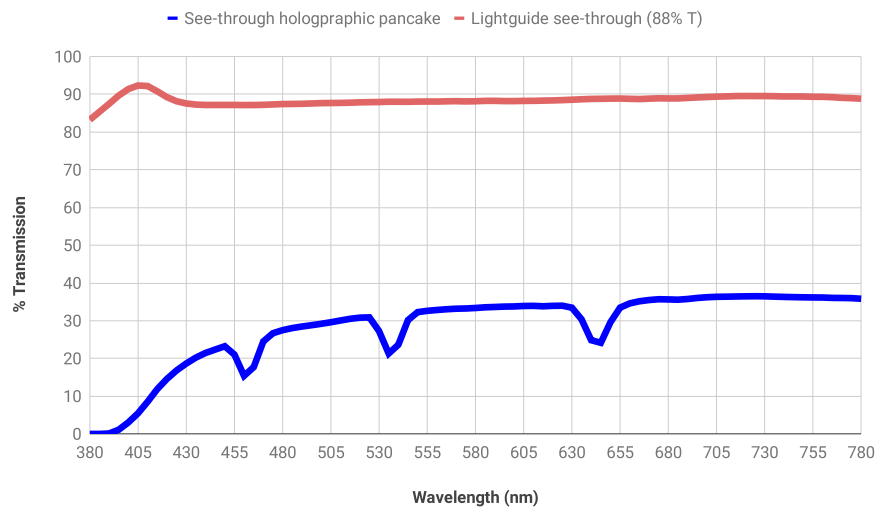

**Fig. S1.** Optical see-through holographic pancake transmission across the visible spectrum.
